# Supplementary material for: Rapid enzymatic detection of Shigatoxin-producing E. coli using fluorescence-labeled oligonucleotide substrates
Source: bioRxiv or medRxiv preprint supplement (doi:10.1101/2023.10.12.562006), 2023-10-12
Supplement: Supplementary file [file media-1.pdf]

## Ramming et al., Tab. S1

Tab. S1. Characteristics of the *Shigella* and STEC AB<sub>5</sub> Shiga toxins

|                                                                  | <b>Stx</b>                            | <b>Stx1</b>                                                                    | <b>Stx2</b>                                                      | <b>Reference</b>                                               |
|------------------------------------------------------------------|---------------------------------------|--------------------------------------------------------------------------------|------------------------------------------------------------------|----------------------------------------------------------------|
| <b>Organism</b>                                                  | <i>Shigella dysenteriae</i>           | STEC                                                                           | STEC                                                             |                                                                |
| <b>Subtypes</b>                                                  | 1a                                    | 1a, 1c, 1d                                                                     | 2a-o                                                             | Scheutz et al., 2012<br>Yang et al., 2022                      |
| <b>Protein sequence identity to Stx of <i>S. dysenteriae</i></b> | 100 %                                 | 91 – 99 %*                                                                     | ~ 55 %*                                                          | Bergan et al., 2012                                            |
| <b>No. of amino acids</b>                                        |                                       | A1: 251<br>A2: 42                                                              | A1: 250<br>A2: 47                                                | Li & Tumer, 2017                                               |
| <b>Active site in StxA1</b>                                      | Glu 167                               | Glu 167 covered by the A2 chain in the holotoxin (A1-A2)                       | Glu 166 open conformation in the holotoxin (A1-A2)               | Yamasaki et al., 1991<br>Steyert et al., 2012<br>Jackson, 1990 |
| <b>Bacterial growth media and Stx production</b>                 | n.k.                                  | Culture media affect bacterial growth and concentration of Stx in supernatants |                                                                  | Rocha & Piazza, 2007                                           |
| <b>Activity of StxA1 on SRL RNA</b>                              | n.k.                                  | $k_{cat} = 21.5 \text{ min}^{-1}$ ;<br>lower compared to Stx2A1                | $k_{cat} = 62.6 \text{ min}^{-1}$ ;<br>higher compared to Stx1A1 | Basu et al., 2015                                              |
| <b>Optimal pH for activity</b>                                   | n.k.                                  | <i>in vitro</i> : acidic pH (pH 4.5)                                           |                                                                  | Basu et al., 2015                                              |
| <b>Activity and temperature</b>                                  | Activity loss $\geq 65^\circ\text{C}$ | Activity loss $\geq 65^\circ\text{C}$                                          | Activity loss $\geq 85^\circ\text{C}$                            | Chan & Ng, 2016                                                |

\* Sequence identities of all Stx subtypes are summarized in Bergan *et al.*, 2012; n.k., not known

## Ramming et al., Fig. S1

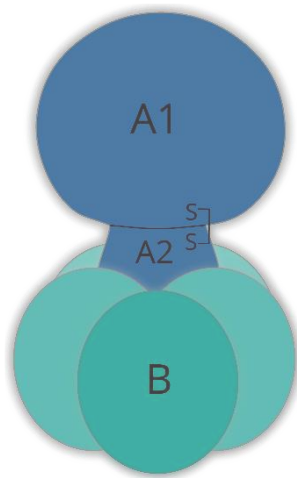

| Sub-unit | MW [kDa] | No. of amino acids (without signal peptide) |       | Function                                                        | Reference                                  |
|----------|----------|---------------------------------------------|-------|-----------------------------------------------------------------|--------------------------------------------|
|          |          | Stx1                                        | Stx2  |                                                                 |                                            |
| A        | 32       | 293                                         | 297   | A1 and A2 connected by disulfide bridge after cleavage by furin | Gyles et al., 1988<br>Scheutz et al., 2012 |
| A1       | 27.5     | 251                                         | 250   | Enzymatic activity, 28S rRNA N-glycosidase activity             | Scheutz et al., 2012                       |
| A2       | 4.5      | 42                                          | 47    | Indispensable for holotoxin structure                           | Menge, 2020                                |
| B        | 7.7      | 69                                          | 68–70 | Binding to Gb3/CD77 receptor                                    | Takeda et al., 1993                        |

**Fig. S1. Structure of the STEC AB5 toxin Shiga toxin (Bergan et al., 2012) and characteristics of Stx1 and Stx2 A and B subunits.**

Ramming et al., Fig. S2

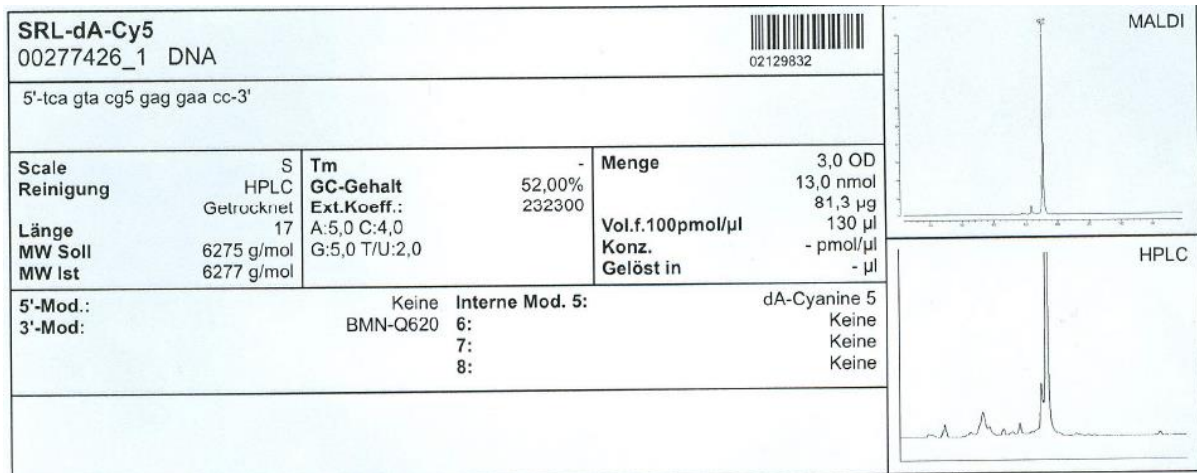

Fig. S2. Quality control analysis report of StxSense 1 (biomers.net).

Ramming et al., Fig. S3

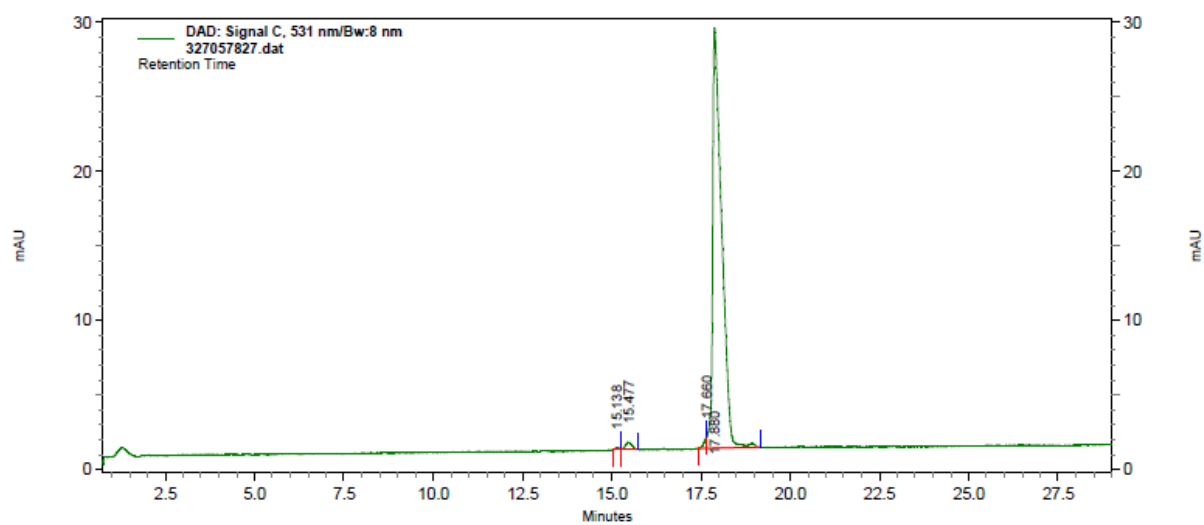

DAD: Signal C, 531 nm/Bw:8 nm Results

| Peak # | Time  | Height | Area    | Area Percent |
|--------|-------|--------|---------|--------------|
| 1      | 15.14 | 293    | 2387    | 0.2          |
| 2      | 15.48 | 1108   | 14277   | 1.3          |
| 3      | 17.66 | 1460   | 7702    | 0.7          |
| 4      | 17.88 | 59110  | 1033939 | 97.7         |
| Totals |       | 61971  | 1058305 | 100.0        |

Fig. S3. Quality control analysis report of StxSense 2 (integrated DNA Technologies, idt).

Ramming et al., Fig. S4

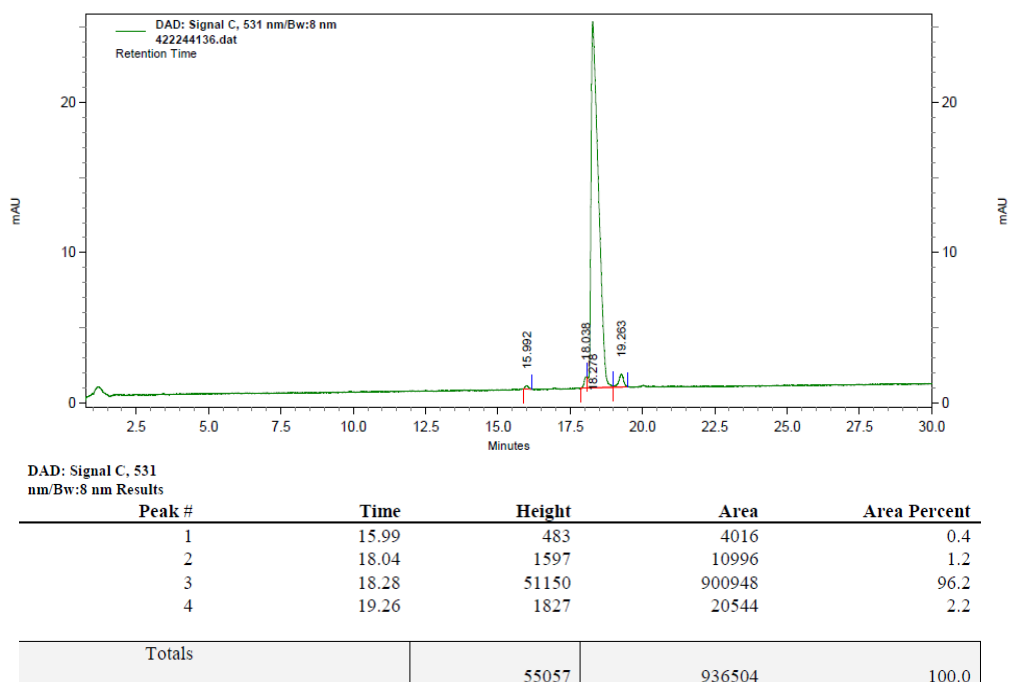

Fig. S4. Quality control analysis report of StxSense 3 (integrated DNA Technologies, idt).

Ramming et al., Fig. S5

Integrated DNA Technologies

Analytical OligoPro CE Report

Sample ID: 233071385-21 SS HPLC A2 55887  
 Instrument: Oligo Pro (Offline) Operator: HTA  
 Acquired: 8/22/2022 5:55:00 AM Reviewed: 8/22/2022 7:48:16 AM

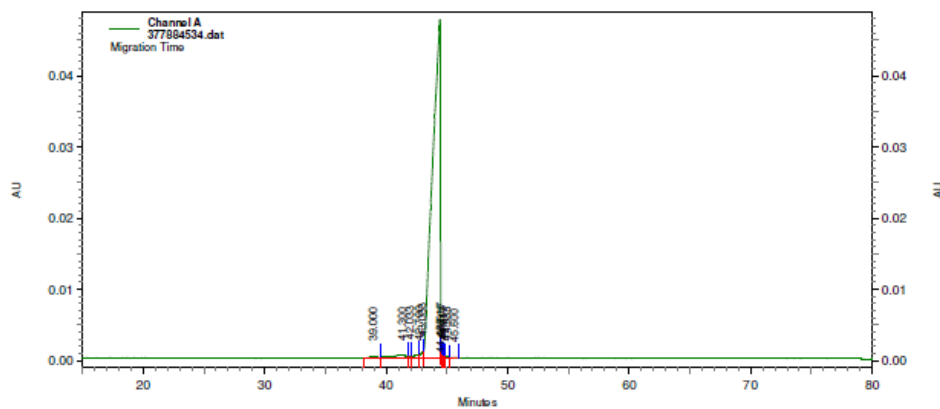

Channel A Results

| Peak # | Time  | Height | Corrected Area | Corrected Area Percent |       |
|--------|-------|--------|----------------|------------------------|-------|
| 1      | 39.00 | 145    | 160            | 0.4                    |       |
| 2      | 41.30 | 372    | 757            | 1.7                    |       |
| 3      | 42.03 | 284    | 92             | 0.2                    |       |
| 4      | 42.70 | 456    | 294            | 0.7                    |       |
| 5      | 43.03 | 821    | 258            | 0.6                    |       |
| 6      | 44.43 | 47506  | 42884          | 95.9                   |       |
| 7      | 44.52 | 879    | 50             | 0.1                    |       |
| 8      | 44.62 | 433    | 45             | 0.1                    |       |
| 9      | 44.72 | 292    | 43             | 0.1                    |       |
| 10     | 44.98 | 269    | 86             | 0.2                    |       |
| 11     | 45.60 | 70     | 31             | 0.1                    |       |
| Totals |       |        | 51527          | 44700                  | 100.0 |

Fig. S5. Quality control analysis report of StxSense 4 (integrated DNA Technologies, idt).

Ramming et al., Fig. S6: SRL substrates (belongs to Fig. 2)

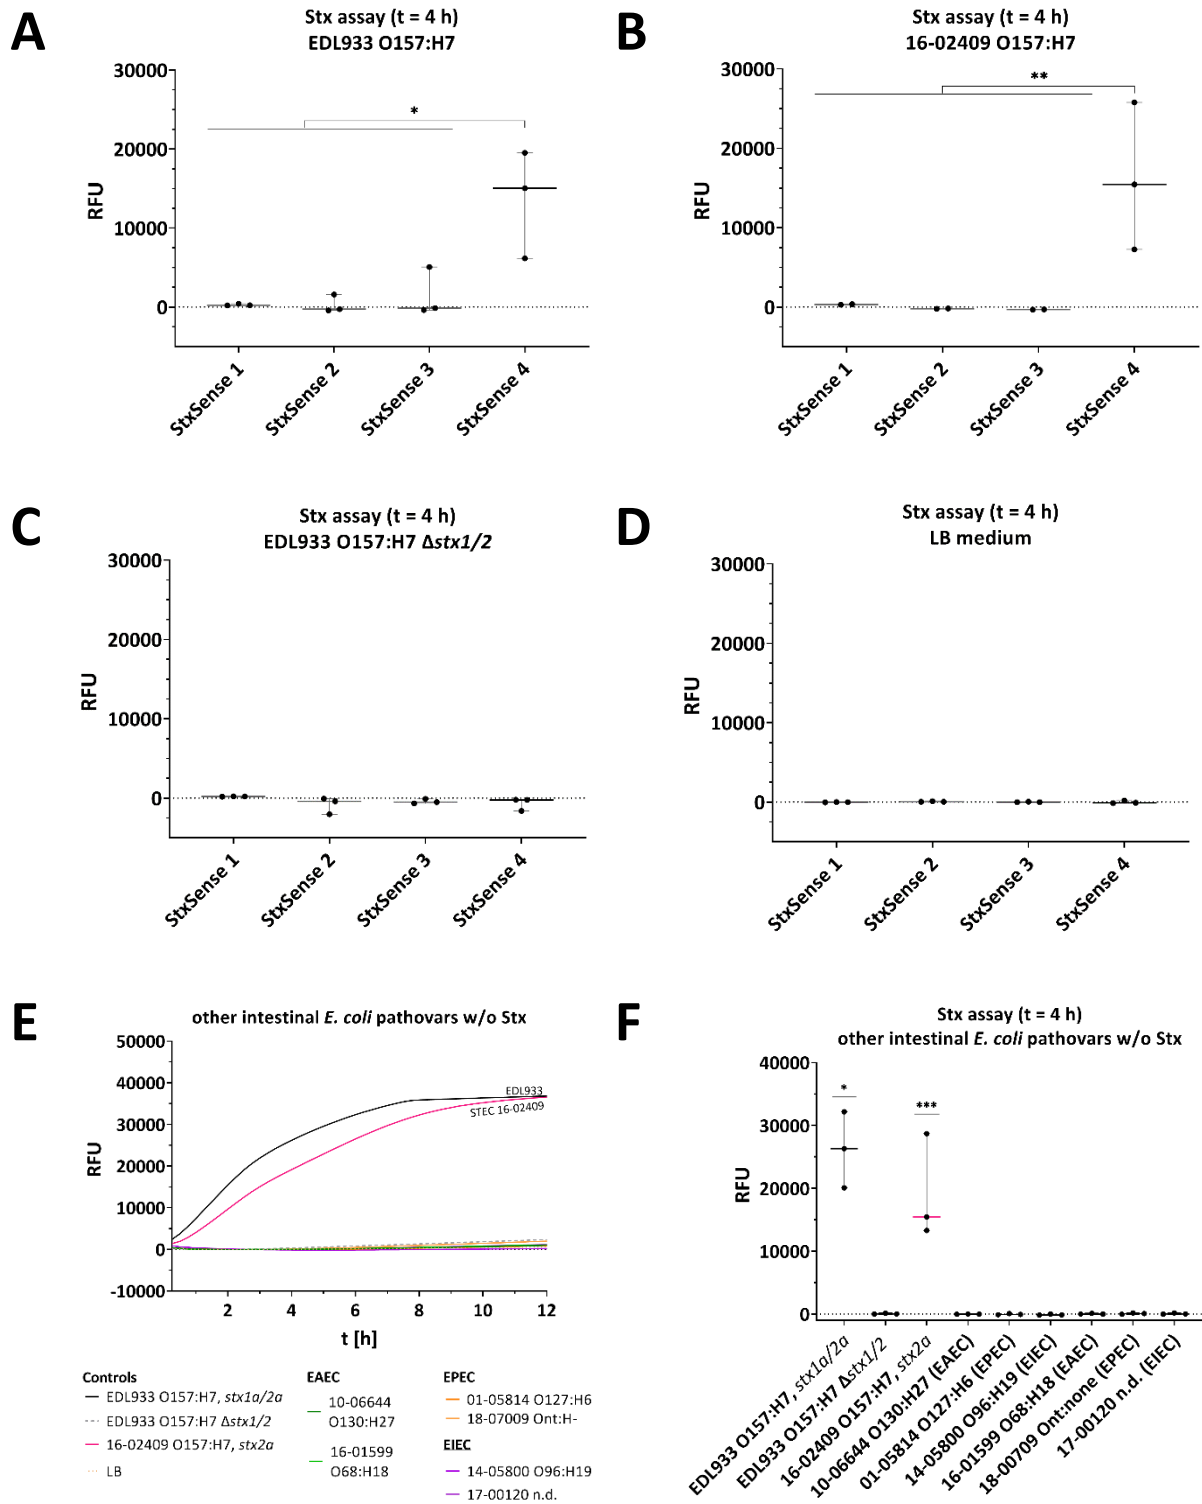

Ramming et al., Fig. S6 continued

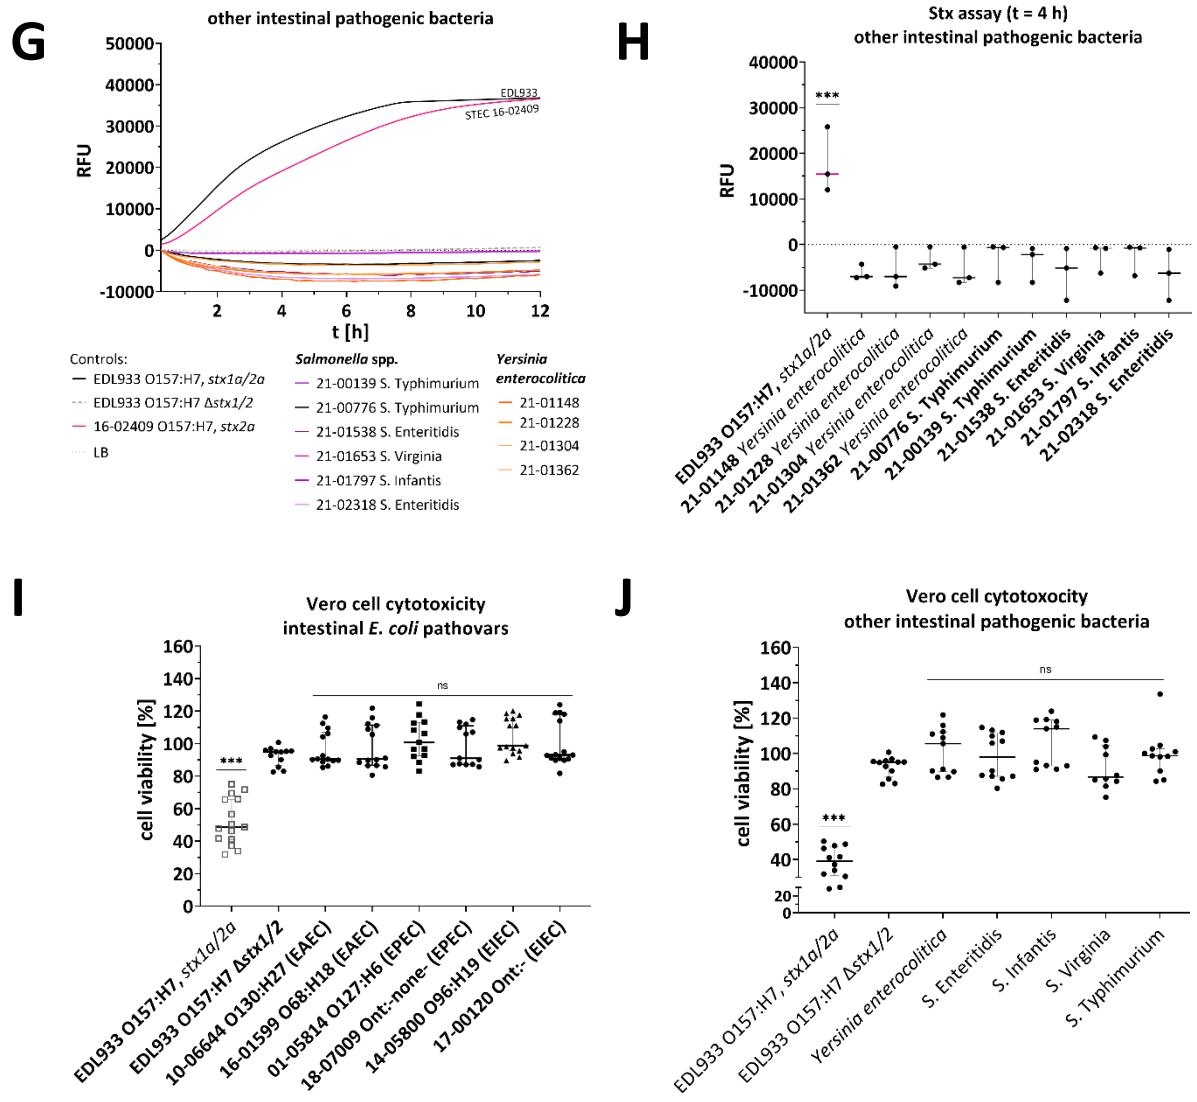

**Fig. S6. Statistics of the Stx enzyme activity assay for STEC and controls. Statistics of the Vero cell cytotoxicity and Stx enzyme activity assay for other intestinal pathogenic bacteria producing no Stx.** Detected fluorescence as a marker of substrate hydrolysis by Stx from different culture supernatants after 4 h incubation of (A) EDL933 O157:H7, *stx1a/2a*; (B) 16-02409 O157:H7, *stx2a*, (C) EDL933 O157:H7  $\Delta$ *stx1/2*, and (D) LB using the four SRL substrates. Data refer to the data shown in Fig. 2. Other intestinal *E. coli* pathovars: (E and F) Stx enzymatic activity assay for culture supernatants for up to 12 h (E) or for 4 h (F) and (I) Vero cell cytotoxicity assay. Other intestinal pathogenic bacteria: (G and H) Stx enzymatic activity assay for culture supernatants for up to 12 h (H) or for 4 h (I) and (J) Vero cell cytotoxicity assay. For Vero cell cytotoxicity assay, cell viability of Vero cells was analyzed using MTT assay after inoculation with diluted bacterial culture supernatants (1:400) for 48 h. For statistics of Stx enzymatic activity assay, RFU at 4 h reaction time and 44 °C are shown. The results represent the medians of triplicate samples (n = 3) and are representative of three independent experiments. Error bars represent standard deviation. Statistical analysis was performed by unpaired, double-sided t test (A-D, F, H), Mann-Whitney test (I and J) (\*, p < 0.05; \*\*, p < 0.01; \*\*\*, p < 0.001), with results compared to those of EDL933 O157:H7  $\Delta$ *stx1/2*. RFU, Relative Fluorescent Unit.



Ramming et al., Fig. S7: assay conditions

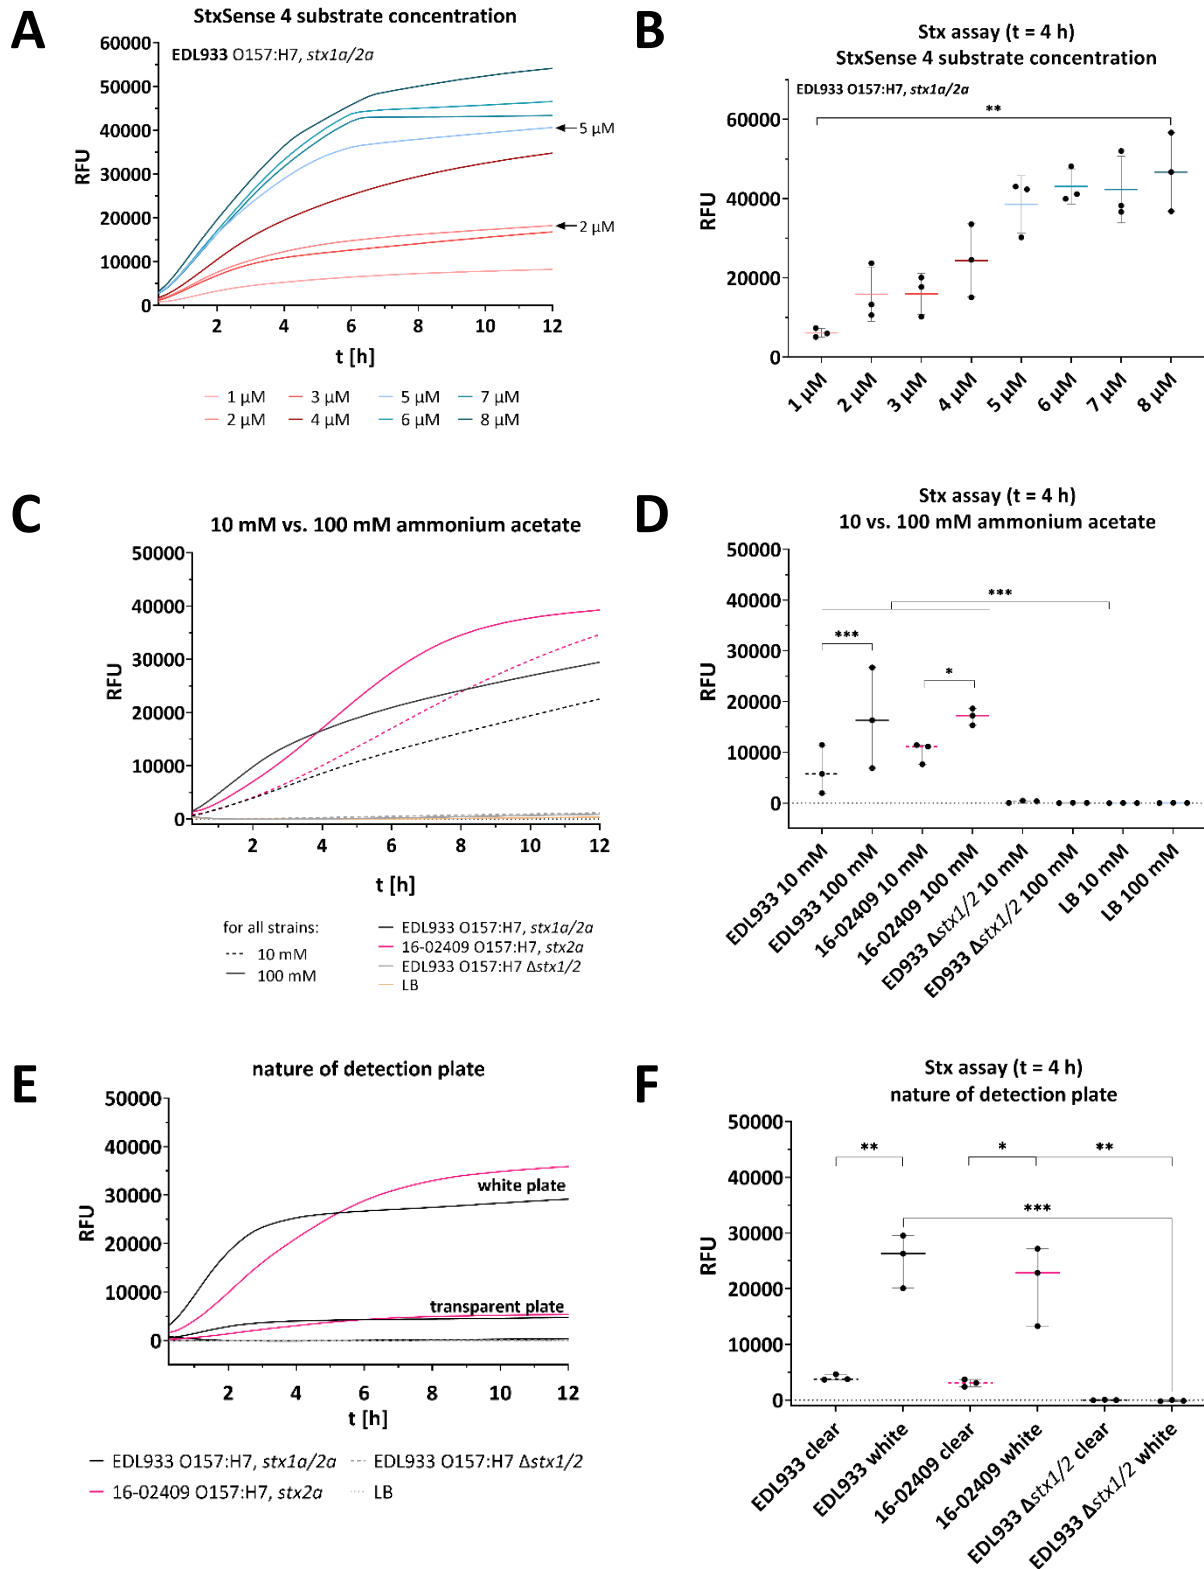

## Ramming et al., Fig. S7 continued

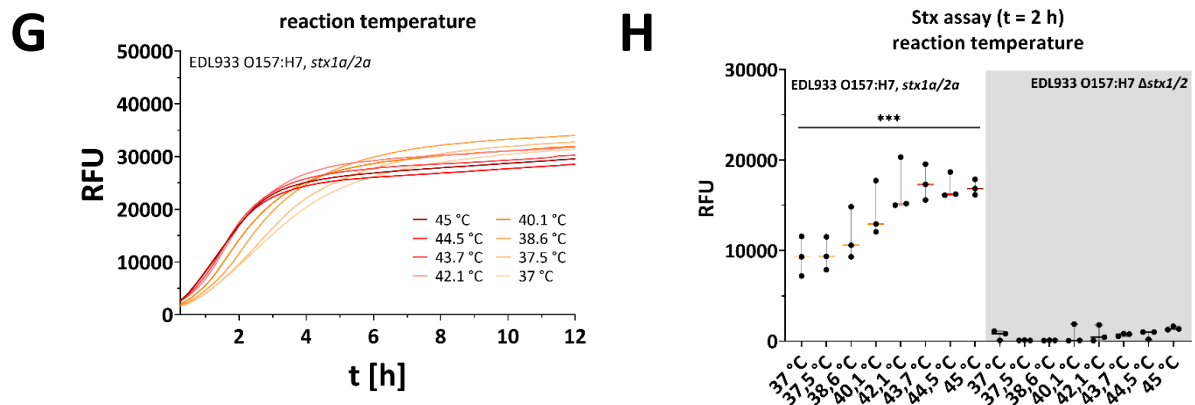

**Fig. S7. Optimal assay conditions for Stx detection in culture supernatants.** Detected fluorescence as a marker of substrate hydrolysis by Stx from positive control EDL933 O157:H7, *stx1a/2a* and/or test strain STEC 16-02409 O157:H7, *stx2a*, and negative control EDL933 O157:H7  $\Delta$ *stx1/2*. **(A and B)** Optimal fluorescence readout for Stx was achieved using SRL substrate StxSense 4 concentrations from 2  $\mu$ M in 100 mM ammonium acetate. **(C and D)** 100 mM ammonium acetate yielded in higher fluorescence signals *stx2a*-producing strain compared to 10 mM ammonium acetate. **(E and F)** Using a white 96 well plate instead of a clear plate was essential for fluorescence detection of Stx-positive samples. **(G and H)** Reaction temperatures above 43.7 °C were optimal Stx detection. Reaction conditions for (A, B, E, F) were 44 °C, 100 mM ammonium acetate, 2  $\mu$ M StxSense 4. The results represent the medians of triplicate samples (n = 3) and are representative of three independent experiments. Error bars represent standard deviation. Statistical analysis was performed by Mann-Whitney test for non-normally distributed samples (B, H) and unpaired, double-sided t test (D, F) (\*,  $p < 0.05$ ; \*\*,  $p < 0.01$ ; \*\*\*,  $p < 0.001$ ), with results compared to those of EDL933 O157:H7  $\Delta$ *stx1/2* (negative control; -- [grey dashed lines]). RFU, relative fluorescence units; t [h], time [hours].

Ramming et al., Fig. S8: Stx-producing strains (belongs to Fig. 4)

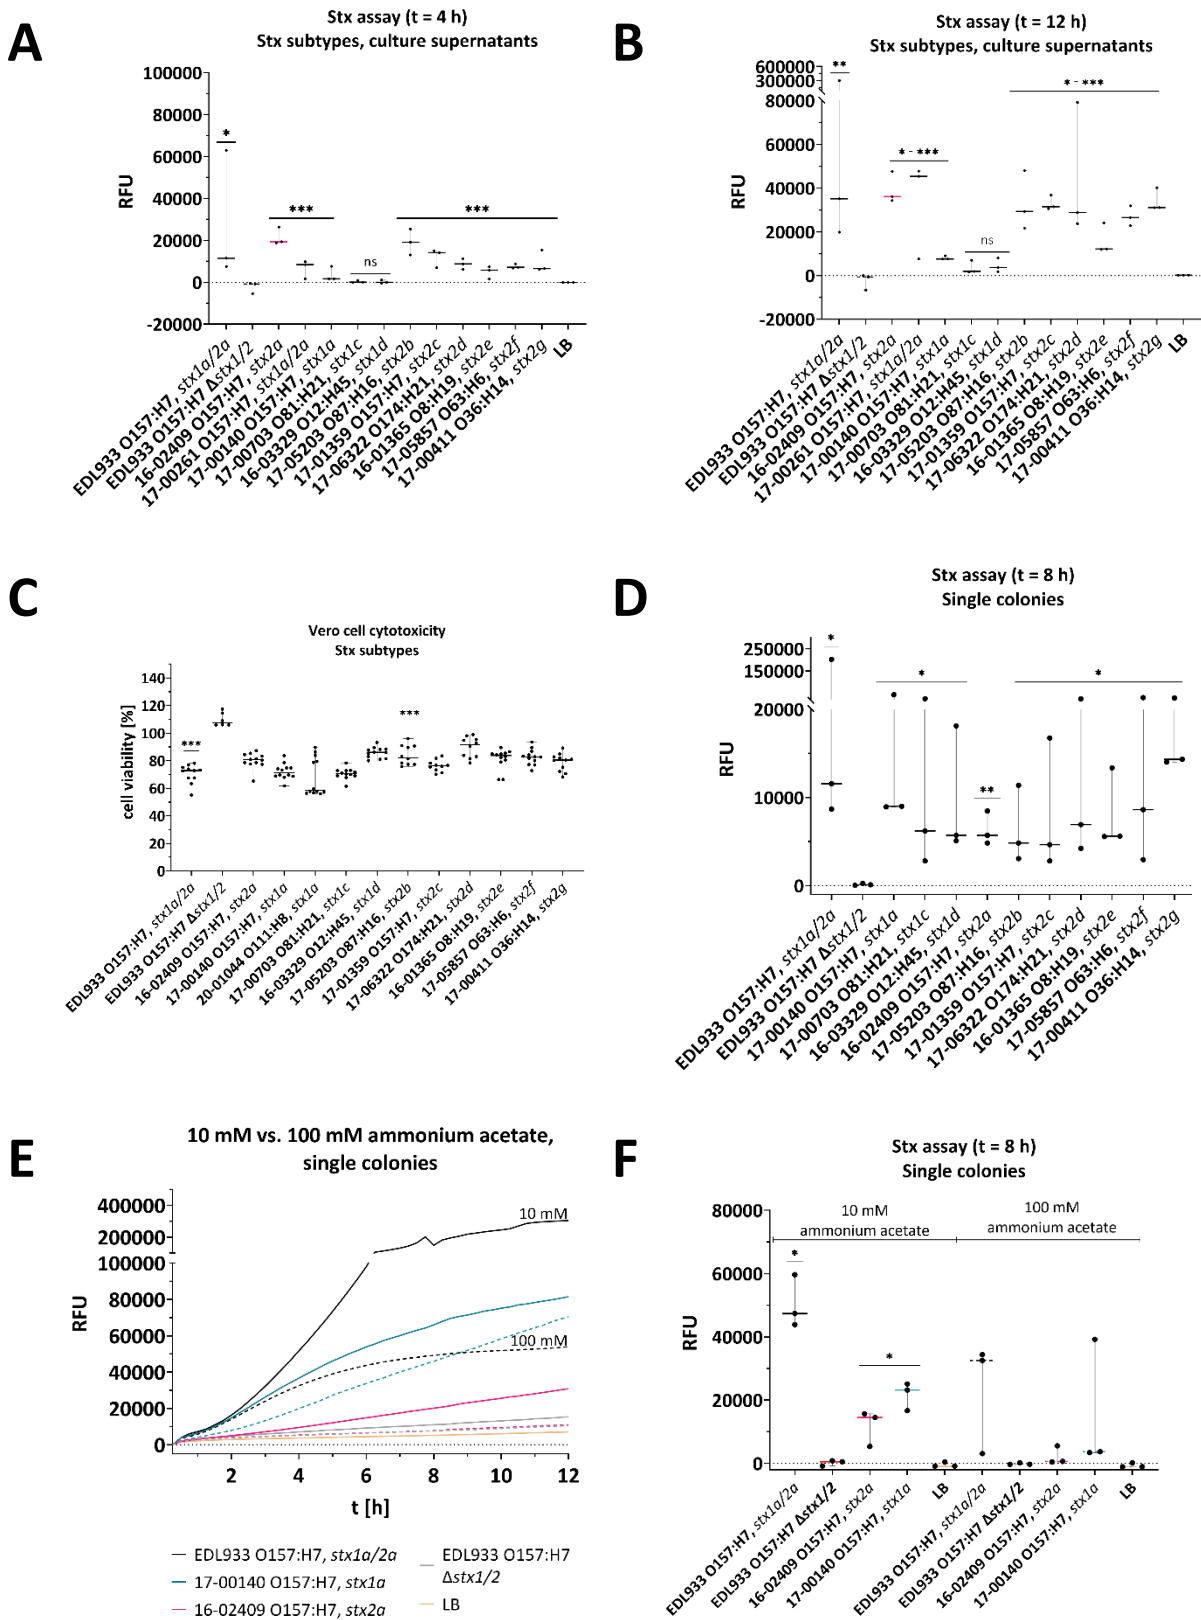

Ramming et al., Fig. S8 continued

**G**

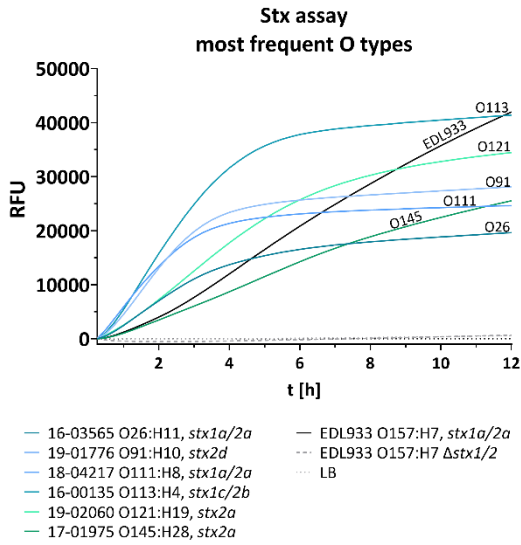

**H**

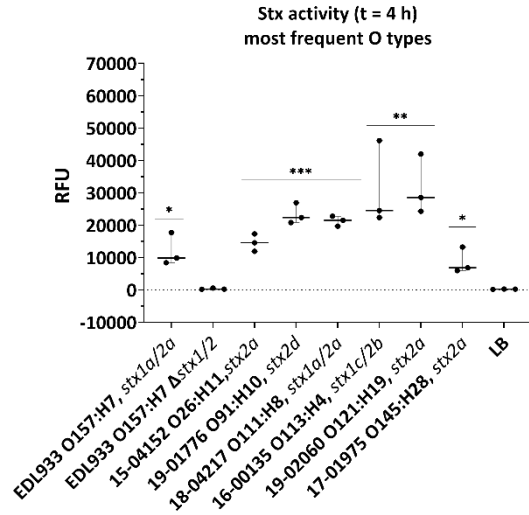

**I**

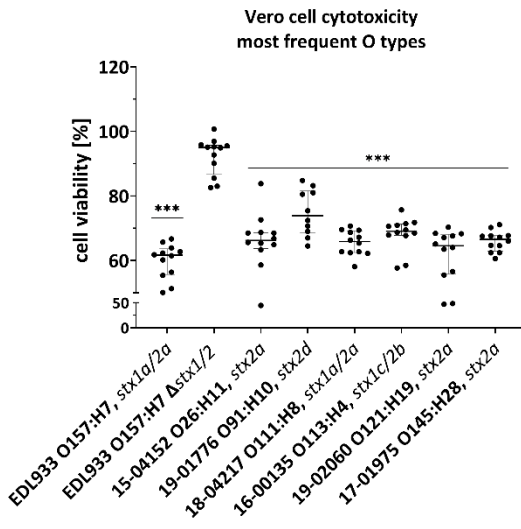

**J**

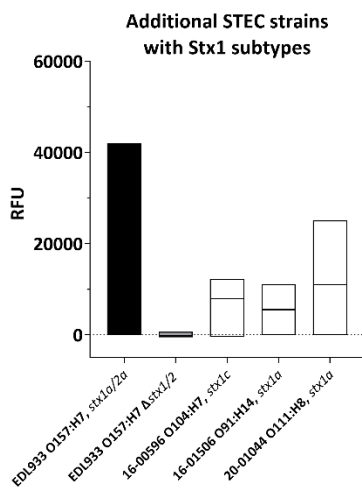

**K**

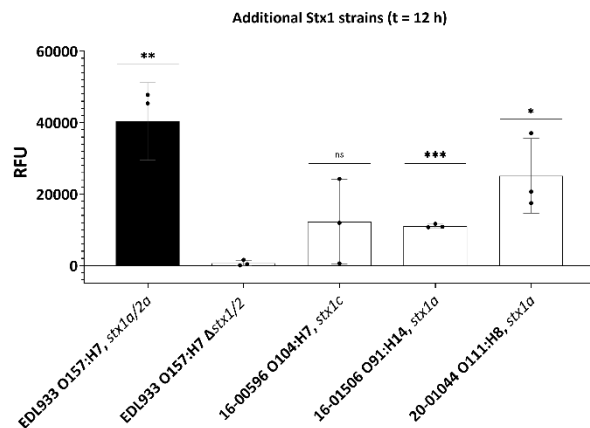

Ramming et al., Fig. S8 continued (2)

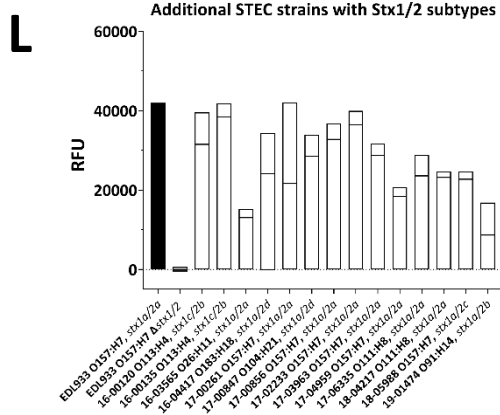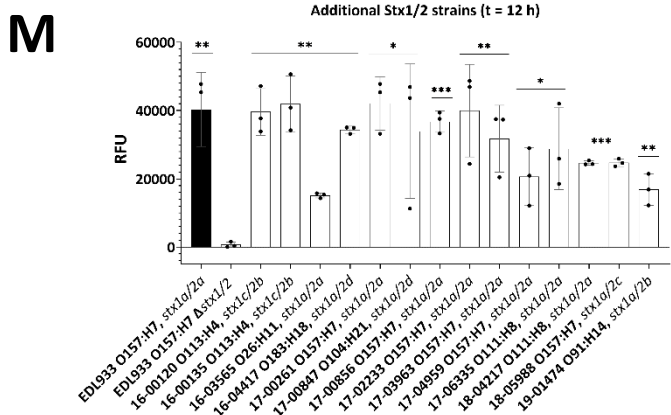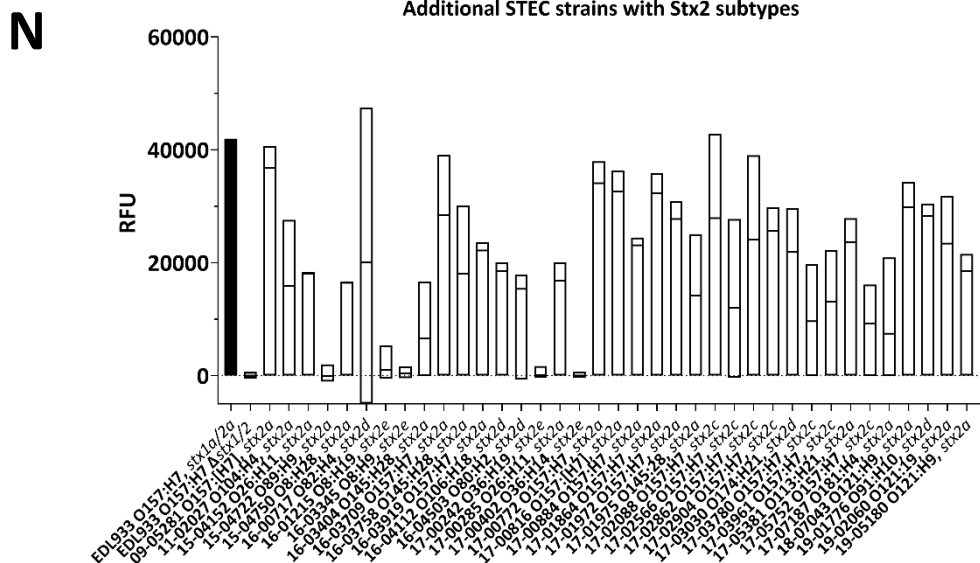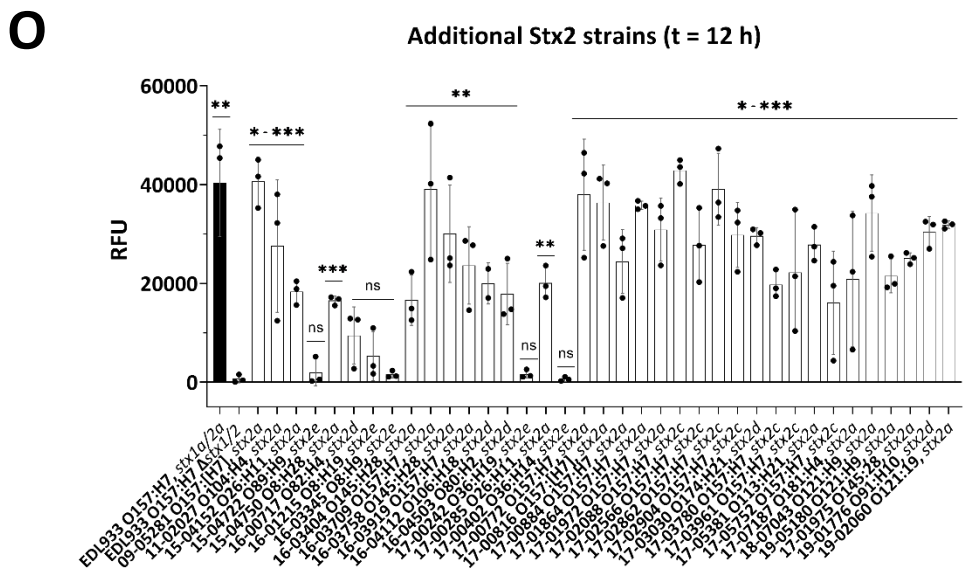

## Ramming et al., Fig. S8 continued (3)

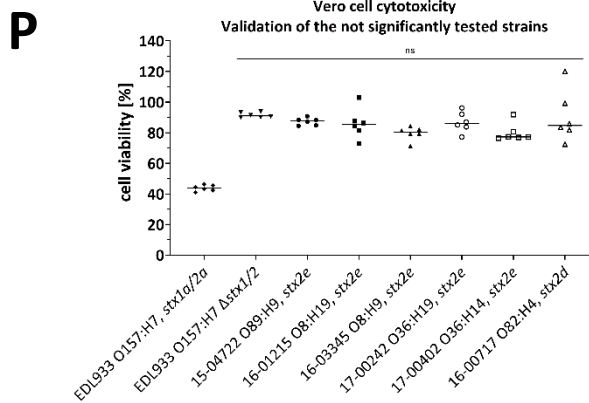

**Fig. S8. Statistics of Vero cell cytotoxicity assay and Stx activity assay for Stx1 and Stx2 subtypes (see Fig. 4A).** (A, B, D-H, J-O) Detected fluorescence of Stx activity from (A and B) culture supernatants of STEC strains covering Stx1a-Stx1d and Stx2a-2g at (A) 4 h and (B) 12 h; (D) single colonies of STEC strains covering Stx1a-Stx1d and Stx2a-2g, (E and F) single colonies of STEC strains and influence of 10 mM vs. 100 mM ammonium acetate, (G and H) most frequent serotypes; (J to O) Detected fluorescence of culture supernatants of different STEC strains comprising (J and K) Stx1, (L and M) Stx1/2, (N and O) Stx2, with positive control EDL933 O157:H7, *stx1a/2a* (black filled bar), and negative control EDL933 O157:H7  $\Delta$ *stx1/2* (grey filled bar) as floating bars (min to max RFU) with line at the median RFU over 12 h and statistics. (J to O) were performed within the same analysis. Shown are the RFU of culture supernatants at 4 h reaction time in 100 mM ammonium acetate, if not stated otherwise, 2  $\mu$ M StxSense 4, 44 °C, white reaction plate. (C, I and P) Cell viability of Vero cells was analyzed using MTT assay after inoculation with diluted bacterial culture supernatants (1:400) for 48 h: (C) STEC strains comprising different Stx subtypes, (I) most frequent serotypes. Data refer to the data shown in Fig. 4, (P) Verification of STEC strains not significantly tested within the STEC detection assay. The results are medians of triplicate samples (n = 3) of three independent experiments. Error bars represent standard deviation. Statistical analysis was performed by Mann-Whitney test (A, B, D-F, H, K, M, O) and unpaired, double-sided t test (C, I) (\*, p < 0.05; \*\*, p < 0.01; \*\*\*, p < 0.001), with results compared to those of EDL933 O157:H7  $\Delta$ *stx1/2*. RFU, Relative Fluorescent Unit; ns, not significant.

Ramming et al., Fig. S9: *Shigella*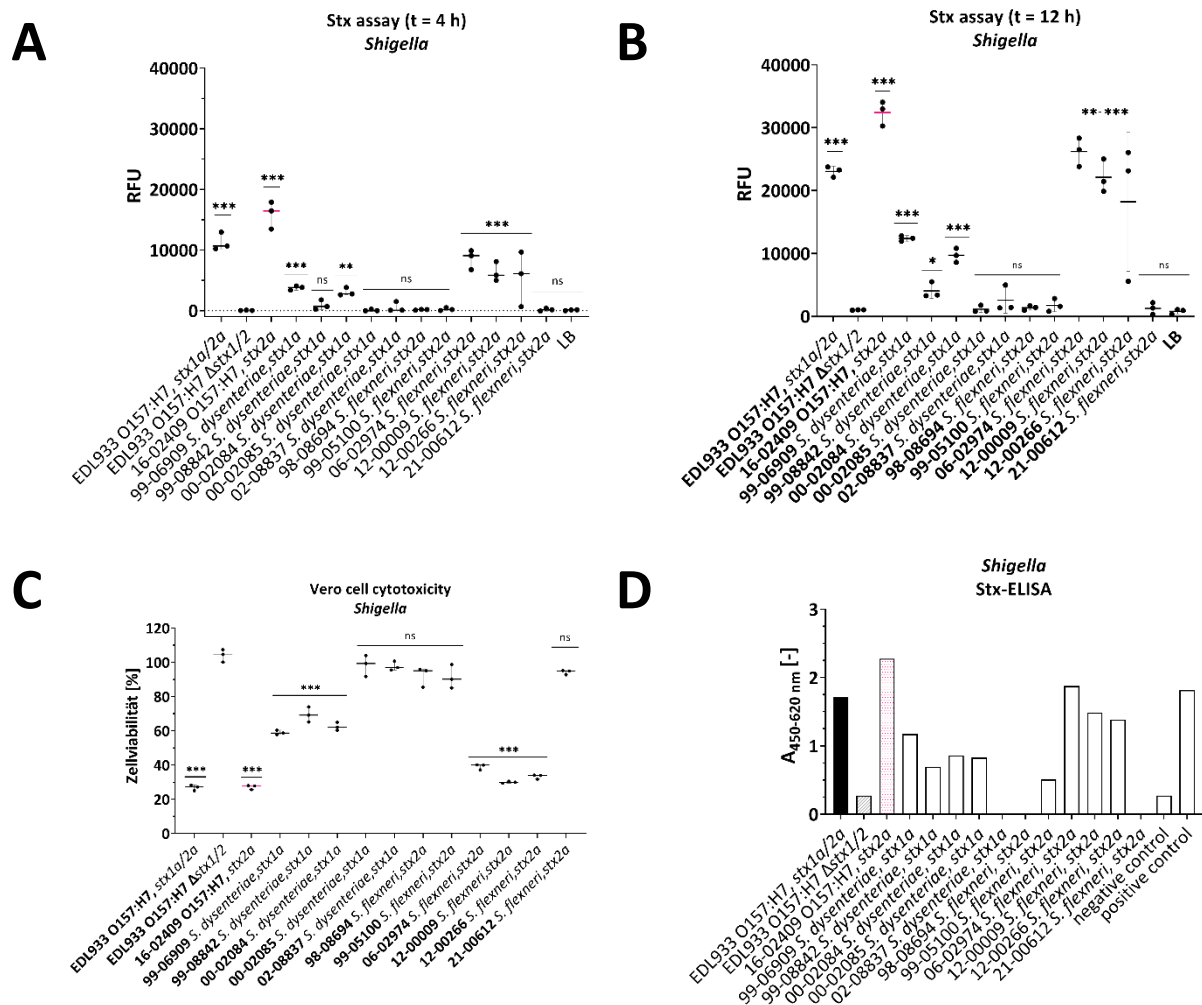

**Fig. S9. Statistics of Vero cell cytotoxicity assay and Stx activity assay for different *Shigella* strains.** (A and B) Detected fluorescence of culture supernatants of different *Shigella* spp. strains and positive control EDL933 O157:H7, *stx1a/2a*, STEC strain 16-02409 O157:H7, *stx2a* and negative control EDL933 O157:H7  $\Delta$ *stx1/2* at (A) 4h and (B) 12 h. The assay was performed using 100 mM ammonium acetate, 2  $\mu$ M StxSense 4, 44  $^{\circ}$ C. (C) Cell viability of Vero cells was analyzed using MTT assay after inoculation with diluted bacterial culture supernatants (1:400) for 48 h. (D) Commercial Stx ELISA (R-Biopharm AG, Darmstadt, Germany) of culture supernatant (OD<sub>600</sub> of 3.0) from different *Shigella* strains detecting Stx1 and Stx2 (n = 1). All other results are medians of triplicate samples (n = 3) of three independent experiments. Error bars represent standard deviation. Statistical analysis was performed by Mann-Whitney test (A) and unpaired, double-sided t test (B) (\*, p < 0.05; \*\*, p < 0.01; \*\*\*, p < 0.001) with results compared to those of EDL933 O157:H7  $\Delta$ *stx1/2*. RFU, Relative Fluorescent Unit; ns, not significant.

**Table S2: STEC strains used in the study (Ramming et al., xxx).**

In total, 65 STEC strains were analyzed for Stx activity. The determined genome sequences were uploaded to the European Nucleotide Archive under the study Acc. No. PRIB832361 (Lang et al., 2019; Lang et al., 2023). The STEC serotype was determined using Whole Genome Analysis, classical serotyping or PCR-based serotyping (Scheut et al., 2012; Lang et al., 2019). *eaeA* presence was determined using Whole Genome Analysis or PCR-based serotyping (Schmidt et al., 1993; Lang et al., 2019). n.d., not determined; +, positive analysis test result; -, negative analysis test result; ns, not significant.

| Strain No.               | Year of isolation | O group | H type | MLST sequence type | Accession No.             | stx1 subtype | stx2 subtype | eaeA | Reference           | FRET assay supernatant | where to find? |
|--------------------------|-------------------|---------|--------|--------------------|---------------------------|--------------|--------------|------|---------------------|------------------------|----------------|
| 1 EDL933                 | 2001              | 157     | 7      | 11                 | GCF_000732965.1           | stx1a        | stx2a        | +    | Perna et al., 2001  | +                      | pos control    |
| 2 EDL933 $\Delta$ stx1/z | 2007              | 157     | 7      | n.d.               | -                         | -            | -            | +    | Gobert et al., 2007 | -                      | neg control    |
| 3 09-05281               | 2009              | 157     | -/[7]  | n.d.               | n.d.                      | -            | stx2a        | +    | This study          | +                      | Fig. S8N       |
| 4 11-02027               | 2011              | 104     | 4      | 678                | SAMN03168461              | -            | stx2a        | -    | Frank et al., 2011  | +                      | Fig. S8N       |
| 5 15-04152               | 2015              | 26      | 11     | 29                 | ERS3396064 (SAMEA5591849) | -            | stx2a        | +    | Lang et al., 2019   | +                      | Fig. S8N       |
| 6 15-04722               | 2015              | 89      | 9      | 10                 | ERS3396066 (SAMEA5591851) | -            | stx2e        | -    | Lang et al., 2019   | n.s.                   | Fig. S8N       |
| 7 15-04750               | 2015              | 8       | 28     | 162                | ERS3396067 (SAMEA5591852) | -            | stx2e        | -    | Lang et al., 2019   | +                      | Fig. S8N       |
| 8 16-00120               | 2016              | 113     | 4      | 10                 | ERS3396073 (SAMEA5591858) | stx1c        | stx2b        | -    | Lang et al., 2019   | +                      | Fig. S8L       |
| 9 16-00135               | 2016              | 113     | 4      | 10                 | ERS3396074 (SAMEA5591859) | stx1c        | stx2b        | -    | Lang et al., 2019   | +                      | Fig. S8G       |
| 10 16-00596              | 2016              | 104     | 7      | 1817               | ERS3396083 (SAMEA5591868) | stx1c        | -            | -    | Lang et al., 2019   | +                      | Fig. S8I       |
| 11 16-00717              | 2016              | 82      | 4      | 10                 | ERS3396090 (SAMEA5591875) | -            | stx2d        | -    | Lang et al., 2019   | n.s.                   | Fig. S8N       |
| 12 16-01215              | 2016              | 8       | 19     | 88                 | ERS3396098 (SAMEA5591883) | -            | stx2e        | -    | Lang et al., 2019   | n.s.                   | Fig. S8N       |
| 13 16-01365              | 2016              | 8       | 19     | 201                | ERS3396100 (SAMEA5591885) | -            | stx2e        | -    | Lang et al., 2019   | +                      | Fig. 4A/B      |
| 14 16-01506              | 2016              | 91      | 14     | 33                 | ERS3396103 (SAMEA5591888) | stx1a        | -            | -    | Lang et al., 2019   | +                      | Fig. S8J       |
| 15 16-02409              | 2016              | 157     | 7      | 11                 | ERS3396113 (SAMEA5591898) | -            | stx2a        | +    | Lang et al., 2019   | +                      | Fig. 2, 4C     |
| 16 16-03329              | 2016              | 12      | 45     | n.d.               | ERS3396123 (SAMEA5591908) | stx1d        | -            | -    | Lang et al., 2019   | +                      | Fig. 4A/B      |
| 17 16-03345              | 2016              | 8       | 9      | 23                 | ERS3396125 (SAMEA5591910) | -            | stx2e        | -    | Lang et al., 2019   | n.s.                   | Fig. S8N       |
| 18 16-03404              | 2016              | 145     | 28     | 32                 | ERS3396126 (SAMEA5591911) | -            | stx2a        | +    | Lang et al., 2019   | +                      | Fig. S8N       |
| 19 16-03565              | 2016              | 26      | 11     | 21                 | ERS3396129 (SAMEA5591914) | stx1a        | stx2a        | +    | Lang et al., 2019   | +                      | Fig. S8G       |
| 20 16-03709              | 2016              | 157     | 7      | 11                 | ERS3396134 (SAMEA5591919) | -            | stx2a        | +    | Lang et al., 2019   | +                      | Fig. S8N       |
| 21 16-03758              | 2016              | 145     | 28     | 32                 | ERS3396135 (SAMEA5591920) | -            | stx2a        | +    | Lang et al., 2019   | +                      | Fig. S8N       |
| 22 16-03919              | 2016              | 157     | 7      | 11                 | ERS3396136 (SAMEA5591921) | -            | stx2a        | +    | Lang et al., 2019   | +                      | Fig. S8N       |
| 23 16-04112              | 2016              | 106     | 18     | 663                | ERS3396140 (SAMEA5591925) | -            | stx2d        | -    | Lang et al., 2019   | +                      | Fig. S8N       |
| 24 16-04417              | 2016              | 183     | 18     | 657                | ERS3396151 (SAMEA5591936) | stx1a        | stx2d        | -    | Lang et al., 2019   | +                      | Fig. S8L       |
| 25 16-04503              | 2016              | 80      | 2      | 301                | ERS3396152 (SAMEA5591937) | -            | stx2d        | +    | Lang et al., 2019   | +                      | Fig. S8N       |
| 26 17-00140-1            | 2017              | 157     | 7      | 11                 | ERS3396169 (SAMEA5591954) | stx1a        | -            | +    | Lang et al., 2019   | +                      | Fig. 4A/B      |
| 27 17-00242              | 2017              | 36      | 19     | 10                 | ERS3396170 (SAMEA5591955) | -            | stx2e        | -    | Lang et al., 2019   | n.s.                   | Fig. S8L       |
| 28 17-00261              | 2017              | 157     | 7      | 11                 | ERS3396171 (SAMEA5591956) | stx1a        | stx2a        | +    | Lang et al., 2019   | +                      | Fig. 4A/B      |
| 29 17-00285              | 2017              | 26      | 11     | 29                 | ERS3396172 (SAMEA5591957) | -            | stx2a        | +    | Lang et al., 2019   | +                      | Fig. S8L       |
| 30 17-00402              | 2017              | 36      | 14     | 1176               | ERS3396173 (SAMEA5591958) | -            | stx2e        | -    | Lang et al., 2019   | n.s.                   | Fig. S8L       |
| 31 17-00411              | 2017              | 36      | 14     | 1176               | ERS3396174 (SAMEA5591959) | -            | stx2g        | -    | Lang et al., 2019   | +                      | Fig. 4A/B      |
| 32 17-00703              | 2017              | 81      | 21     | 737                | ERS3396178 (SAMEA5591963) | stx1c        | -            | -    | Lang et al., 2019   | +                      | Fig. 4A/B      |
| 33 17-00772              | 2017              | 157     | 7      | 11                 | ERS3396179 (SAMEA5591964) | -            | stx2a        | +    | Lang et al., 2019   | +                      | Fig. S8N       |
| 34 17-00816              | 2017              | 157     | -/[7]  | n.d.               | n.d.                      | -            | stx2a        | +    | This study          | +                      | Fig. S8N       |
| 35 17-00847              | 2017              | 104     | 21     | 672                | ERS3396182 (SAMEA5591967) | stx1a        | stx2d        | -    | Lang et al., 2019   | +                      | Fig. S8L       |
| 36 17-00856              | 2017              | 157     | 7      | 11                 | ERS3396183 (SAMEA5591968) | stx1a        | stx2a        | +    | Lang et al., 2019   | +                      | Fig. S8L       |
| 37 17-00884              | 2017              | 157     | 7      | 11                 | ERS3396185 (SAMEA5591970) | -            | stx2a        | +    | Lang et al., 2019   | +                      | Fig. S8N       |
| 38 17-01359              | 2017              | 157     | 7      | 11                 | ERS3396196 (SAMEA5591981) | -            | stx2c        | +    | Lang et al., 2019   | +                      | Fig. 4A/B      |
| 39 17-01864              | 2017              | 157     | 7      | 11                 | ERS3396199 (SAMEA5591984) | -            | stx2a        | +    | Lang et al., 2019   | +                      | Fig. S8N       |
| 40 17-01972              | 2017              | 157     | 7      | 587                | ERS3396200 (SAMEA5591985) | -            | stx2a        | +    | Lang et al., 2019   | +                      | Fig. S8N       |
| 41 17-01975              | 2017              | 145     | 28     | 32                 | ERS3396201 (SAMEA5591986) | -            | stx2a        | +    | Lang et al., 2019   | +                      | Fig. S8G       |
| 42 17-02088              | 2017              | 157     | 7      | 1804               | ERS3396202 (SAMEA5591987) | -            | stx2c        | +    | Lang et al., 2019   | +                      | Fig. S8N       |
| 43 17-02233              | 2017              | 157     | 7      | 11                 | ERS3396203 (SAMEA5591988) | stx1a        | stx2a        | +    | Lang et al., 2019   | +                      | Fig. S8L       |
| 44 17-02566              | 2017              | 157     | 7      | 11                 | ERS3396204 (SAMEA5591989) | -            | stx2c        | +    | Lang et al., 2019   | +                      | Fig. S8N       |
| 45 17-02862              | 2017              | 157     | 7      | 11                 | ERS3396210 (SAMEA5591995) | -            | stx2c        | +    | Lang et al., 2019   | +                      | Fig. S8N       |
| 46 17-02904              | 2017              | 157     | 7      | n.d.               | n.d.                      | -            | stx2c        | +    | This study          | +                      | Fig. S8N       |
| 47 17-03030              | 2017              | 174     | 21     | 677                | ERS3396212 (SAMEA5591997) | -            | stx2d        | -    | Lang et al., 2019   | +                      | Fig. S8N       |
| 48 17-03780              | 2017              | 157     | 7      | 11                 | ERS3396215 (SAMEA5592000) | -            | stx2c        | +    | Lang et al., 2019   | +                      | Fig. S8N       |
| 49 17-03961              | 2017              | 157     | 7      | 11                 | ERS3396218 (SAMEA5592003) | -            | stx2c        | +    | Lang et al., 2019   | +                      | Fig. S8N       |
| 50 17-03963              | 2017              | 157     | 7      | 11                 | ERS3396219 (SAMEA5592004) | stx1a        | stx2a        | +    | Lang et al., 2019   | +                      | Fig. S8L       |
| 51 17-04959              | 2017              | 157     | 7      | 11                 | ERS3396225 (SAMEA5592010) | stx1a        | stx2a        | +    | Lang et al., 2019   | +                      | Fig. S8L       |
| 52 17-05203              | 2017              | 87      | 16     | 2101               | ERS3396229 (SAMEA5592014) | -            | stx2b        | -    | Lang et al., 2019   | +                      | Fig. 4A/B      |
| 53 17-05381              | 2017              | 113     | 21     | 223                | ERS3396236 (SAMEA5592021) | -            | stx2a        | -    | Lang et al., 2019   | +                      | Fig. S8N       |
| 54 17-05752              | 2017              | 157     | 7      | 11                 | ERS3396247 (SAMEA5592032) | -            | stx2c        | +    | Lang et al., 2019   | +                      | Fig. S8N       |
| 55 17-05857              | 2017              | 63      | 6      | 583                | ERS3396253 (SAMEA5592038) | -            | stx2f        | +    | Lang et al., 2019   | +                      | Fig. 4A/B      |
| 56 17-06322              | 2017              | 174     | 21     | 677                | ERS3396266 (SAMEA5592051) | -            | stx2d        | -    | Lang et al., 2019   | +                      | Fig. 4A/B      |
| 57 17-06335              | 2017              | 111     | 8      | 16                 | ERS3396269 (SAMEA5592054) | stx1a        | stx2a        | +    | Lang et al., 2019   | +                      | Fig. S8L       |
| 58 17-07187              | 2017              | 181     | 4      | n.d.               | n.d.                      | -            | stx2a        | -    | Lang et al., 2023   | +                      | Fig. S8N       |
| 59 18-04217              | 2018              | 111     | 8      | n.d.               | n.d.                      | stx1a        | stx2a        | +    | This study          | +                      | Fig. S8G       |
| 60 18-05988              | 2018              | 157     | 7      | n.d.               | n.d.                      | stx1a        | stx2c        | +    | This study          | +                      | Fig. S8L       |
| 61 18-07043              | 2018              | 121     | 9      | n.d.               | n.d.                      | -            | stx2a        | +    | This study          | +                      | Fig. S8N       |
| 62 19-01474              | 2019              | 91      | 14     | n.d.               | n.d.                      | stx1a        | stx2b        | -    | This study          | +                      | Fig. S8L       |
| 63 19-01776              | 2019              | 91      | 10     | n.d.               | n.d.                      | -            | stx2d        | -    | This study          | +                      | Fig. S8G       |
| 64 19-02060              | 2019              | 121     | 19     | n.d.               | n.d.                      | -            | stx2a        | +    | This study          | +                      | Fig. S8G       |
| 65 19-05180              | 2019              | 121     | 19     | n.d.               | n.d.                      | -            | stx2a        | +    | This study          | +                      | Fig. S8N       |
| 66 20-01044              | 2020              | 111     | 8      | n.d.               | n.d.                      | stx1a        | -            | +    | This study          | +                      | Fig. S8J       |

**References:**

Perna, N., Plunkett, G., Burland, V. et al. Genome sequence of enterohaemorrhagic *Escherichia coli* O157:H7. *Nature* **409**, 529–533 (2001). <https://doi.org/10.1038/35016170>

Gobert, A. P., Varelle, M., Glasser, A.-L., Hindré, T., de Sablet, T., & Martin, C. (2007). Shiga Toxin Produced by Enterohemorrhagic *Escherichia coli* Inhibits PI3K/NF- $\kappa$ B Signaling Pathway in Globotriaosylceramide-3-Negative Human Intestinal Epithelial Cells. *The Journal of Immunology*, *178*(12), 8168–8174.

Frank, C., Werber, D., Cramer, J. P., Askar, M., Faber, M., an der Heiden, M., Bernard, H., Fruth, A., Prager, R., Spode, A., Wadl, M., Zoufaly, A., Jordan, S., Kemper, M. J., Follin, P., Müller, L., King, L. A., Rosner, B., Buchholz, U., Krause, G. (2011). Epidemic Profile of Shiga-Toxin-Producing *Escherichia coli* O104:H4 Outbreak in Germany. *New England Journal of Medicine*, *365*(19), 1771–1780. <https://doi.org/10.1056/nejmoa1106483>

Lang, C., Hiller, M., Konrad, R., & Fruth, A. (2019). Whole-Genome-Based Public Health Surveillance of Less Common Shiga Toxin-Producing *Escherichia coli* Serovars and Untypeable Strains Identifies Four Novel O Genotypes. *September*, 1–12.

Lang, C., Fruth, A., Campbell, I. W., Jenkins, C., Smith, P., Weill, F.-X., Nübel, U., Grad, Y. H., & Flieger, A. (2023). O-antigen diversification masks identification of highly pathogenic STEC O104:H4-like 1 strains 2.3. *Microbiology Spectrum*. <https://doi.org/10.1101/2022.09.15.508078>



**Table S3: Other intestinal *E. coli* pathovar strains without Stx used in the study (Ramming et al., xxx).**

The *E. coli* pathovar serotype was determined using Whole Genome Analysis, classical serotyping or PCR-based serotyping (Scheutz et al., 2012; Lang et al., 2019). *eaeA* presence was determined using Whole Genome Analysis or PCR-based serotyping (Schmidt et al., 1993; Lang et al., 2019). n.d., not determined; +, positive analysis test result; -, negative analysis test result.

|   | Strain no.        | Year of isolation | Pheno-typic O group | Pheno-typic H type | pathovar | <i>eaeA</i> | Reference  | FRET assay supernatant | where to find? | Vero cell cytotoxicity assay | where to find? |
|---|-------------------|-------------------|---------------------|--------------------|----------|-------------|------------|------------------------|----------------|------------------------------|----------------|
| 1 | <b>10-06644</b>   | 2010              | 130                 | 27                 | EAEC     | n.d.        | This study | -                      | Fig. S6E, F    | -                            | Fig. S6I       |
| 2 | <b>16-01599-2</b> | 2016              | 68                  | 18                 | EAEC     | -           | This study | -                      | Fig. S6E, F    | -                            | Fig. S6I       |
| 3 | <b>01-05814</b>   | 2001              | 127                 | 6                  | EPEC     | +           | This study | -                      | Fig. S6E, F    | -                            | Fig. S6I       |
| 4 | <b>18-07009-2</b> | 2018              | Ont                 | -                  | EPEC     | +           | This study | -                      | Fig. S6E, F    | -                            | Fig. S6I       |
| 5 | <b>18-07383-2</b> | 2018              | Ont                 | -                  | EPEC     | +           | This study | -                      | Fig. S6E, F    | -                            | Fig. S6I       |
| 6 | <b>14-05800-2</b> | 2014              | 96                  | 19                 | EIEC     | n.d.        | This study | -                      | Fig. S6E, F    | -                            | Fig. S6I       |
| 7 | <b>17-00120</b>   | 2017              | n.d.                | n.d.               | EIEC     | n.d.        | This study | -                      | Fig. S6E, F    | -                            | Fig. S6I       |

**Table S4: *Yersinia* and *Salmonella* strains used in the study (Ramming et al., xxx).**

The species or serovar was determined using Whole Genome Analysis, classical serotyping or PCR-based serotyping (Lang et al., 2019). +, positive analysis test result; -, negative analysis test result.

| Strain no.         | Year of isolation | Species or serovar                        | Stx1 subtype | Stx2 subtype | Reference  | FRET assay supernatant | where to find? | Vero cell cytotoxicity assay | where to find? |
|--------------------|-------------------|-------------------------------------------|--------------|--------------|------------|------------------------|----------------|------------------------------|----------------|
| 1 <b>21-01148</b>  | 2021              | <i>Yersinia enterocolitica</i>            | -            | -            | This study | -                      | Fig. S6G, H    | -                            | Fig. S6J       |
| 2 <b>21-01228</b>  | 2021              | <i>Yersinia enterocolitica</i>            | -            | -            | This study | -                      | Fig. S6G, H    | -                            | Fig. S6J       |
| 3 <b>21-01304</b>  | 2021              | <i>Yersinia enterocolitica</i>            | -            | -            | This study | -                      | Fig. S6G, H    | -                            | Fig. S6J       |
| 4 <b>21-01362</b>  | 2021              | <i>Yersinia enterocolitica</i>            | -            | -            | This study | -                      | Fig. S6G, H    | -                            | Fig. S6J       |
| 5 <b>21-00139</b>  | 2021              | <i>Salmonella enterica</i> S. Typhimurium | -            | -            | This study | -                      | Fig. S6G, H    | -                            | Fig. S6J       |
| 6 <b>21-00776</b>  | 2021              | <i>Salmonella enterica</i> S. Typhimurium | -            | -            | This study | -                      | Fig. S6G, H    | -                            | Fig. S6J       |
| 7 <b>21-01538</b>  | 2021              | <i>Salmonella enterica</i> S. Enteritidis | -            | -            | This study | -                      | Fig. S6G, H    | -                            | Fig. S6J       |
| 8 <b>21-01653</b>  | 2021              | <i>Salmonella enterica</i> S. Virginia    | -            | -            | This study | -                      | Fig. S6G, H    | -                            | Fig. S6J       |
| 9 <b>21-01797</b>  | 2021              | <i>Salmonella enterica</i> S. Infantis    | -            | -            | This study | -                      | Fig. S6G, H    | -                            | Fig. S6J       |
| 10 <b>21-02318</b> | 2021              | <i>Salmonella enterica</i> S. Enteritidis | -            | -            | This study | -                      | Fig. S6G, H    | -                            | Fig. S6J       |

**Table S4: *Shigella* strains used in the study (Ramming et al., xxx).**

The species or serovar was determined using Whole Genome Analysis, classical serotyping or PCR-based serotyping (Lang et al., 2019). +, positive analysis test result; -, negative analysis test result.

| Strain no. | Year of isolation | Species or serovar | Stx1 subtype                | Stx2 subtype | Reference | FRET assay supernatant | where to find? | Vero cell cytotoxicity assay | where to find? | Stx ELISA | where to find? |          |
|------------|-------------------|--------------------|-----------------------------|--------------|-----------|------------------------|----------------|------------------------------|----------------|-----------|----------------|----------|
| 1          | <b>99-06909</b>   | 1999               | <i>Shigella dysenteriae</i> | stx1a        | -         | This study             | +              | Fig. S9A, B                  | +              | Fig. S9C  | +              | Fig. S9D |
| 2          | <b>99-08842</b>   | 1999               | <i>Shigella dysenteriae</i> | stx1a        | -         | This study             | +              | Fig. S9A, B                  | +              | Fig. S9C  | +              | Fig. S9D |
| 3          | <b>00-02084</b>   | 2000               | <i>Shigella dysenteriae</i> | stx1a        | -         | This study             | +              | Fig. S9A, B                  | +              | Fig. S9C  | +              | Fig. S9D |
| 4          | <b>00-02085</b>   | 2000               | <i>Shigella dysenteriae</i> | stx1a        | -         | This study             | -              | Fig. S9A, B                  | -              | Fig. S9C  | +              | Fig. S9D |
| 5          | <b>02-08837</b>   | 2002               | <i>Shigella dysenteriae</i> | stx1a        | -         | This study             | -              | Fig. S9A, B                  | -              | Fig. S9C  | -              | Fig. S9D |
| 6          | <b>98-08694</b>   | 1998               | <i>Shigella flexneri</i>    | -            | stx2a     | This study             | -              | Fig. S9A, B                  | -              | Fig. S9C  | -              | Fig. S9D |
| 7          | <b>99-05100</b>   | 1999               | <i>Shigella flexneri</i>    | -            | stx2a     | This study             | -              | Fig. S9A, B                  | -              | Fig. S9C  | +              | Fig. S9D |
| 8          | <b>06-02974</b>   | 2006               | <i>Shigella flexneri</i>    | -            | stx2a     | This study             | +              | Fig. S9A, B                  | +              | Fig. S9C  | +              | Fig. S9D |
| 9          | <b>12-00009</b>   | 2012               | <i>Shigella flexneri</i>    | -            | stx2a     | This study             | +              | Fig. S9A, B                  | +              | Fig. S9C  | +              | Fig. S9D |
| 10         | <b>12-00266</b>   | 2012               | <i>Shigella flexneri</i>    | -            | stx2a     | This study             | +              | Fig. S9A, B                  | +              | Fig. S9C  | +              | Fig. S9D |
| 11         | <b>21-00612</b>   | 2021               | <i>Shigella flexneri</i>    | -            | stx2a     | This study             | -              | Fig. S9A, B                  | -              | Fig. S9C  | -              | Fig. S9D |

### Supplemental Methods

**Western blot analysis.** STEC culture supernatants or cell lysates were electrophoretically separated on a 15 % SDS-polyacrylamide gel. Proteins were transferred to a methanol (99.9 %, Carl Roth GmbH, Karlsruhe, Germany)-activated nitrocellulose membrane (Merck Millipore; Darmstadt, Germany). The membrane was then blocked in 5 % milk (in TBS-T, Sigma-Aldrich, Darmstadt, Germany) at 4 °C overnight. Primary monoclonal mouse antibodies against Stx1 (MBS5307327; MyBioSource Inc., San Diego, USA) or Stx2 (VT 135/6-B9; Sifin, Berlin, Germany) were added at a dilution of 1:1,000 for 3 h. StarBright Blue 520 Conjugated Goat Anti-Mouse Fluorescent Secondary Antibodies (Bio-Rad Laboratories; Feldkirchen, Germany) were used as secondary antibody at a dilution of 1:50,000 for 1 h. Stx was detected by fluorescence at 520 nm (ChemiDoc MP, Bio-Rad Laboratories, StarBright 520 channel).

**Vero cell cytotoxicity assay.** Toxicity of Stx towards Vero cells was determined as described previously (Roberts et al., 2001) with modifications. Prior to addition of culture supernatants,  $1 \times 10^5$  Vero cells/mL were seeded into a 96 well-plate (Greiner Bio-One; Kremsmünster, Austria) and were incubated for 24h at 37 °C and 5 % CO<sub>2</sub>. Culture supernatants were diluted 1:400 in DMEM with 10 % FBS and 200 µL were added to each well and incubated for 48 h at 37 °C and under 5 % CO<sub>2</sub>. After incubation, the cells were washed with 1× PBS and 100 µL 1-(4,5-Dimethylthiazol-2-yl)-3,5-diphenylformazan (MTT; 0.5 mg/mL in PBS; Sigma) were added for 1 h. After removal, 100 µL acidified isopropanol (isopropanol with 4 % v/v HCl, 32 %) were added. The absorption at 570 nm was photometrically measured at 570 nm (Tecan Infinite M-1000 Pro; Tecan, Suisse) (Mosmann, 1983). The proportion of damaged to viable cells (viability, in %) was calculated using mean absorbance of sample/mean absorbance of Vero cell control × 100.

## References of supplemental data

### Tab. S1, Fig. S1

- Basu, D., Li, X. P., Kahn, J. N., May, K. L., Kahn, P. C., & Tumer, N. E. (2015). The A1 subunit of Shiga toxin 2 has higher affinity for ribosomes and higher catalytic activity than the A1 subunit of Shiga toxin 1. *Infection and Immunity*, *84*(1), 149–161. <https://doi.org/10.1128/IAI.00994-15>
- Bergan, J., Dyve Lingelem, A. B., Simm, R., Skotland, T., & Sandvig, K. (2012). Shiga toxins. *Toxicon*, *60*(6), 1085–1107. <https://doi.org/10.1016/j.toxicon.2012.07.016>
- Chan, Y. S., & Ng, T. B. (2016). Shiga toxins: from structure and mechanism to applications. *Applied Microbiology and Biotechnology*, *100*(4), 1597–1610. <https://doi.org/10.1007/S00253-015-7236-3/TABLES/1>
- Gyles, C. L., De Grandis, S. A., MacKenzie, C., & Brunton, J. L. (1988). Cloning and nucleotide sequence analysis of the genes determining verocytotoxin production in a porcine edema disease isolate of *Escherichia coli*. *Microbial Pathogenesis*, *5*(6), 419–426. [https://doi.org/10.1016/0882-4010\(88\)90003-4](https://doi.org/10.1016/0882-4010(88)90003-4)
- Jackson, M. P. (1990). Mini-review Structure-function analyses of Shiga toxin and the Shiga-like toxins. *Microbial Pathogenesis*, *8*, 23–28.
- Li, X. P., & Tumer, N. E. (2017). Differences in ribosome binding and sarcin/ricin loop depurination by shiga and ricin holotoxins. *Toxins*, *9*(4), 1–12. <https://doi.org/10.3390/toxins9040133>
- Menge, C. (2020). Molecular biology of *Escherichia coli* shiga toxins' effects on mammalian cells. In *Toxins* (Vol. 12, Issue 5). <https://doi.org/10.3390/toxins12050345>
- Mosmann, T. (1983). Rapid colorimetric assay for cellular growth and survival: Application to proliferation and cytotoxicity assays. *Journal of Immunological Methods*, *65*(1–2), 55–63. [https://doi.org/10.1016/0022-1759\(83\)90303-4](https://doi.org/10.1016/0022-1759(83)90303-4)
- Roberts, P. H., Davis, K. C., Garstka, W. R., & Bhunia, A. K. (2001). Lactate dehydrogenase release assay from Vero cells to distinguish verotoxin producing *Escherichia coli* from non-verotoxin producing strains. *Journal of Microbiological Methods*, *43*(3), 171–181. [https://doi.org/10.1016/S0167-7012\(00\)00222-0](https://doi.org/10.1016/S0167-7012(00)00222-0)
- Rocha, L. B., & Piazza, R. M. F. (2007). Production of Shiga toxin by Shiga toxin-expressing *Escherichia coli* (STEC) in broth media: From divergence to definition. *Letters in Applied Microbiology*, *45*(4), 411–417. <https://doi.org/10.1111/j.1472-765X.2007.02214.x>
- Scheutz, F., Teel, L. D., Beutin, L., Piérard, D., Buvens, G., Karch, H., Mellmann, A., Caprioli, A., Tozzoli, R., Morabito, S., Strockbine, N. A., Melton-Celsa, A. R., Sanchez, M., Persson, S., & O'Brien, A. D. (2012). Multicenter evaluation of a sequence-based protocol for subtyping Shiga toxins and standardizing Stx nomenclature. *Journal of Clinical Microbiology*, *50*(9), 2951–2963. <https://doi.org/10.1128/JCM.00860-12>
- Steyert, S. R., Sahl, J. W., Fraser, C. M., Teel, L. D., Scheutz, F., & Rasko, D. A. (2012). Comparative genomics and stx phage characterization of LEE-negative Shiga toxin-producing *Escherichia coli*. *Frontiers in Cellular and Infection Microbiology*, *2*, 133. <https://doi.org/10.3389/FCIMB.2012.00133/BIBTEX>
- Takeda, Y., Kurazono, H., & Yamasaki, S. (1993). Minireview Vero Toxins (Shiga-Like Toxins) Produced by Enterohemorrhagic *Escherichia coli* (Verocytotoxin-Producing *Escherichia coli*). *Microbiol. Immunol*, *37*(8), 591–599.
- Yamasaki, S., Furutani, M., Ito, K., Igarashi, K., Nishibuchi, M., & Takeda, Y. (1991). Importance of

## Supplemental Data

arginine at position 170 of the A subunit of Vero toxin 1 produced by enterohemorrhagic *Escherichia coli* for toxin activity. *Microbial Pathogenesis*, *11*(1), 1–9.  
[https://doi.org/10.1016/0882-4010\(91\)90088-R](https://doi.org/10.1016/0882-4010(91)90088-R)

Yang, X., Liu, Q., Sun, H., Xiong, Y., Matussek, A., & Bai, X. (2022). Genomic Characterization of *Escherichia coli* O8 Strains Producing Shiga Toxin 2I Subtype. *Microorganisms*, *10*(6), 1245.  
<https://doi.org/10.3390/microorganisms10061245>

## Supplemental Methods

Roberts, P. H., Davis, K. C., Garstka, W. R., & Bhunia, A. K. (2001). Lactate dehydrogenase release assay from Vero cells to distinguish verotoxin producing *Escherichia coli* from non-verotoxin producing strains. *Journal of Microbiological Methods*, *43*(3), 171–181. [https://doi.org/10.1016/S0167-7012\(00\)00222-0](https://doi.org/10.1016/S0167-7012(00)00222-0)

## Tab. S2-S4 (Excel file with sub tables)

Frank, C., Werber, D., Cramer, J. P., Askar, M., Faber, M., an der Heiden, M., Bernard, H., Fruth, A., Prager, R., Spode, A., Wadl, M., Zoufaly, A., Jordan, S., Kemper, M. J., Follin, P., Müller, L., King, L. A., Rosner, B., Buchholz, U., ... Krause, G. (2011). Epidemic Profile of Shiga-Toxin–Producing *Escherichia coli* O104:H4 Outbreak in Germany. *New England Journal of Medicine*, *365*(19), 1771–1780.  
[https://doi.org/10.1056/NEJMOA1106483/SUPPL\\_FILE/NEJMOA1106483\\_DISCLOSURES.PDF](https://doi.org/10.1056/NEJMOA1106483/SUPPL_FILE/NEJMOA1106483_DISCLOSURES.PDF)

Gobert, A. P., Vareille, M., Glasser, A.-L., Hindré, T., De Sablet, T., & Martin, C. (2007). Shiga Toxin Produced by Enterohemorrhagic *Escherichia coli* Inhibits PI3K/NF- $\kappa$ B Signaling Pathway in Globotriaosylceramide-3-Negative Human Intestinal Epithelial Cells 1. *The Journal of Immunology*, *178*, 8168–8174. <http://journals.aai.org/jimmunol/article-pdf/178/12/8168/1231196/zim01207008168.pdf>

Lang, C., Hiller, M., Konrad, R., Fruth, A., & Flieger, A. (2019). Whole-Genome-Based Public Health Surveillance of Less Common Shiga Toxin-Producing *Escherichia coli* Serovars and Untypeable Strains Identifies Four Novel O Genotypes. *Journal of Clinical Microbiology*, *57*(10). <https://doi.org/10.1128/JCM.00768-19>

Lang, C., Fruth, A., Campbell, I. W., Jenkins, C., Smith, P., Weill, F.-X., Nübel, U., Grad, Y. H., & Flieger, A. (2023). O-antigen diversification masks identification of highly pathogenic STEC O104:H4-like 1 strains 2 3. *Microbiology Spectrum*. <https://doi.org/10.1101/2022.09.15.508078>

Perna, N. T., Plunkett, G., Burland, V., Mau, B., Glasner, J. D., Rose, D. J., Mayhew, G. F., Evans, P. S., Gregor, J., Kirkpatrick, H. A., Pósfai, G., Hackett, J., Klink, S., Boutin, A., Shao, Y., Miller, L., Grotbeck, E. J., Davis, N. W., Lim, A., Blattner, F. R. (2001). Genome sequence of enterohaemorrhagic *Escherichia coli* O157:H7. *Nature*, *409*(6819), 529–533.  
<https://doi.org/10.1038/35054089>

Schmidt, H., Russmann, H., & Karch, H. (1993). Virulence determinants in nontoxigenic *Escherichia coli* O157 strains that cause infantile diarrhea. *Infection and Immunity*, *61*(11), 4894–4898.  
<https://doi.org/10.1128/IAI.61.11.4894-4898.1993>
